# Supplementary material for: Transcriptome Profiling of Layer 5 Intratelencephalic Projection Neurons From the Mature Mouse Motor Cortex
Source: Front Mol Neurosci. 2018 Nov 12;11:410. doi: 10.3389/fnmol.2018.00410 (PMC6240696; doi:10.3389/fnmol.2018.00410)
Supplement: Supplementary file 2 [file Table_1.XLSX]

## Sheet: Sheet1
Supplementary table 1. Oligos used for the preparation of cDNA libraries for sequencing. All oligos were acquired from; Integrated DNA Technologies Pte. Ltd. AU.
Oligo name	Sequence	Use
Oligo(dT)_BC4	CGATTGAGGCCGGTAATACGACTCACTATAGGGTCTTTCCCTACACGACGCTCTTCCGATCTTGATGCGCTTTTTTTTTTTTTTTTTTTTTTN	Reverse transcription
Oligo(dT)_BC6	CGATTGAGGCCGGTAATACGACTCACTATAGGGTCTTTCCCTACACGACGCTCTTCCGATCTGTCGTATCTTTTTTTTTTTTTTTTTTTTTTN	Reverse transcription
Oligo(dT)_BC12	CGATTGAGGCCGGTAATACGACTCACTATAGGGTCTTTCCCTACACGACGCTCTTCCGATCTTGATGTCCTTTTTTTTTTTTTTTTTTTTTTN	Reverse transcription
Oligo(dT)_BC14	CGATTGAGGCCGGTAATACGACTCACTATAGGGTCTTTCCCTACACGACGCTCTTCCGATCTGTCGTGAATTTTTTTTTTTTTTTTTTTTTTN	Reverse transcription
Oligo(dT)_BC20	CGATTGAGGCCGGTAATACGACTCACTATAGGGTCTTTCCCTACACGACGCTCTTCCGATCTATGTGCGCTTTTTTTTTTTTTTTTTTTTTTN	Reverse transcription
Oligo(dT)_BC22	CGATTGAGGCCGGTAATACGACTCACTATAGGGTCTTTCCCTACACGACGCTCTTCCGATCTCGTGTTCATTTTTTTTTTTTTTTTTTTTTTN	Reverse transcription
Oligo(dT)_BC28	CGATTGAGGCCGGTAATACGACTCACTATAGGGTCTTTCCCTACACGACGCTCTTCCGATCTATGTGGAGTTTTTTTTTTTTTTTTTTTTTTN	Reverse transcription
Oligo(dT)_BC30	CGATTGAGGCCGGTAATACGACTCACTATAGGGTCTTTCCCTACACGACGCTCTTCCGATCTGCTTGCGCTTTTTTTTTTTTTTTTTTTTTTN	Reverse transcription
Oligo(dT)_BC36	CGATTGAGGCCGGTAATACGACTCACTATAGGGTCTTTCCCTACACGACGCTCTTCCGATCTTAGGTTCATTTTTTTTTTTTTTTTTTTTTTN	Reverse transcription
Oligo(dT)_BC38	CGATTGAGGCCGGTAATACGACTCACTATAGGGTCTTTCCCTACACGACGCTCTTCCGATCTGCTTGGAGTTTTTTTTTTTTTTTTTTTTTTN	Reverse transcription
TSO_Biotin	(Biotin)-AGTGAGCAAGTTCAGCCTGGTTAAGTCAGTGAGArGrGrG	Template switch oligo for use in first reverse transcription
Second_RT	AGTGAGCAAGTTCAGCCTGGTTAAGTCAGTGAGANNNNNNNNN	Reverse transcription primer for use on amplified RNA
PCR_Primer1_i5	AATGATACGGCGACCACCGAGATCTACACTCTTTCCCTACACGACGCTCTTCCGATCT	PCR primer for use in final library preparation
PCR_Primer2_i7	CAAGCAGAAGACGGCATACGAGATCGGTCTCGGCATTCCTGCTGAACCGCTCTTCCGATCT	PCR primer for use in final library preparation
